# Supplementary material for: Formation of bis(2-pyridylcarbonyl)aminate by oxidation of ethylbis(2-pyridylmethyl)amine on the trichloridoruthenium(iii) complex
Source: Royal Society of Chemistry journal article supplement (doi:10.1039/c4dt01842g), 2014-01-01
Supplement: c4dt01842g1.pdf [file c4dt01842g1.pdf]

## Supplementary Information

# Formation of Bis(2-pyridylcarbonyl)aminato by Oxidation of Ethylbis(2-pyridylmethyl)amine on Trichloridoruthenium(III) Complex

Hirota Nagao\*, Naoto Shimura, and Haruka Yonezawa

Department of Materials and Life Sciences, Sophia University, 7-1 Kioi-cho, Chiyoda-ku, Tokyo 102-8554, Japan

### (1) Electrochemical properties of *fac*-[Ru<sup>III</sup>Cl<sub>3</sub>(ebpma)]

CVs of *fac*-[Ru<sup>III</sup>Cl<sub>3</sub>(ebpma)] in CH<sub>3</sub>CN at room temperature and -40°C are shown in Figure S1(a) and (b). Controlled potential electrolysis (CPE) of *fac*-[Ru<sup>III</sup>Cl<sub>3</sub>(ebpma)] in CH<sub>3</sub>CN was performed at 1.1 V. After CPE, a new oxidation wave was observed at 1.2 V as shown in Fig. S1(c).

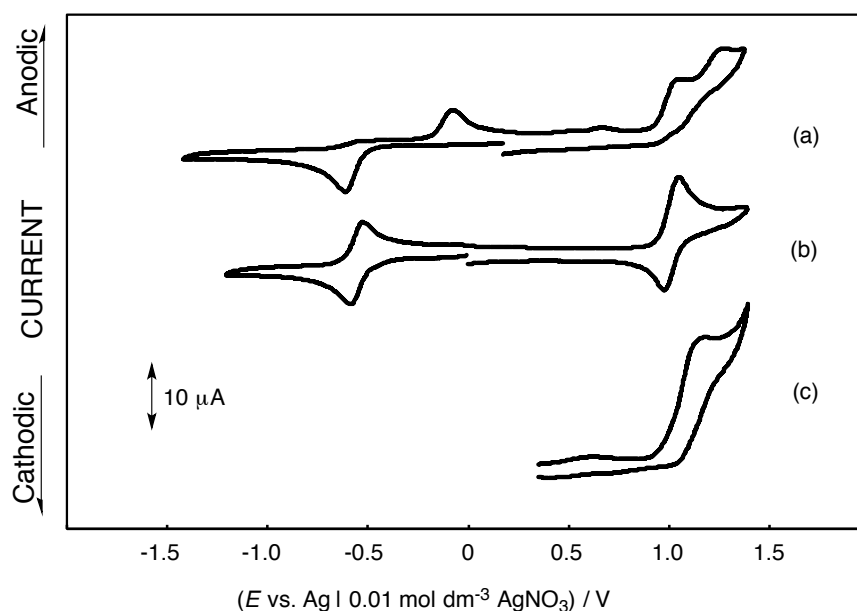

**Fig. S1** Cyclic voltammograms in CH<sub>3</sub>CN; (a) and (b) *fac*-[Ru<sup>III</sup>Cl<sub>3</sub>(ebpma)] at room temperature and -40°C, (c) after the CPE at 1.1 V of *fac*-[Ru<sup>III</sup>Cl<sub>3</sub>(ebpma)].

### Analysis of NPV for the oxidation wave

Normal pulse voltammetry was carried out in CH<sub>3</sub>CN at -40°C with sampling time of 20, 40, and 60 ms. These NPVs were analyzed using the Nernst equation below.

$$\ln\left(\frac{i_o}{i_d - i_o}\right) = \frac{nF}{RT}(E - E_{1/2})$$

The slopes of the line are close to the ideal value (49.8 V<sup>-1</sup>) for one-electron process ( $n = 1$ ), indicating that the oxidation wave is one-electron process.

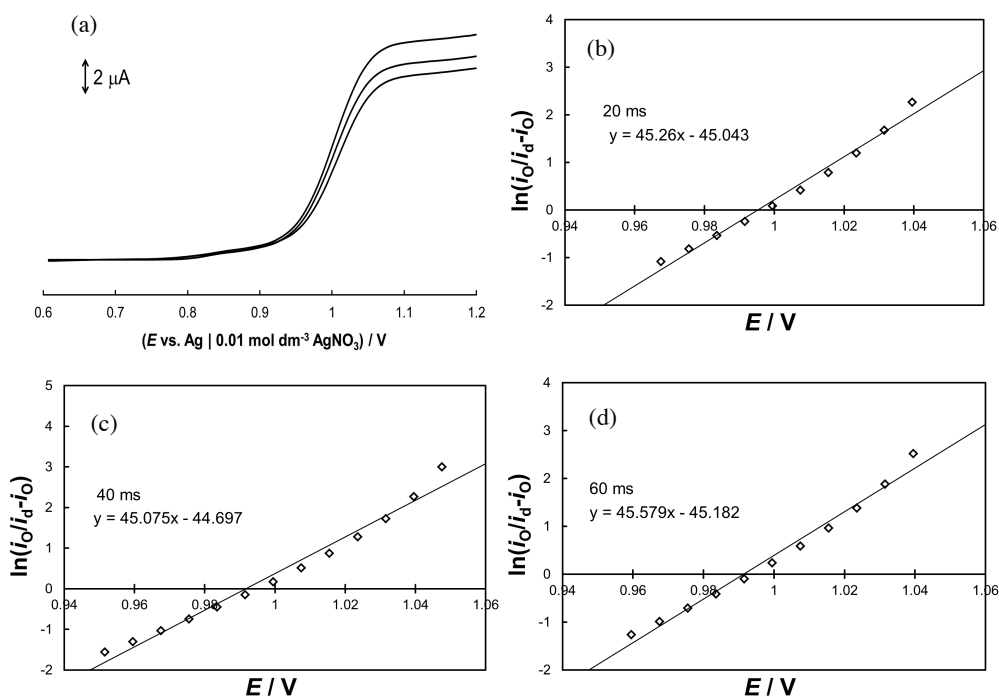

**Fig. S2** Normal pulse voltammograms of *fac*-[Ru<sup>III</sup>Cl<sub>3</sub>(ebpma)] in CH<sub>3</sub>CN at -40°C (a) and the plots of  $\ln(i_o/(i_d-i_o))$  vs.  $E$  (b)-(d).

## (2) IR spectra of ruthenium complexes

IR spectra of *fac*-[Ru<sup>III</sup>Cl<sub>3</sub>(ebpma)], [Ru<sup>III</sup>Cl<sub>2</sub>(NCCH<sub>3</sub>)(bpca)]·H<sub>2</sub>O, [Ru<sup>II</sup>(NCCH<sub>3</sub>)<sub>3</sub>(bpca)]PF<sub>6</sub> and [Ru<sup>III</sup>Cl<sub>3</sub>(Hbpca)] were recorded on a Shimadzu IR Affinity-1 spectrophotometer using samples prepared as KBr disks. The characteristic CO stretching band of bis(2-pyridylcarbonyl)aminato ligand was observed around 1700 cm<sup>-1</sup> as shown in (b) and (c).

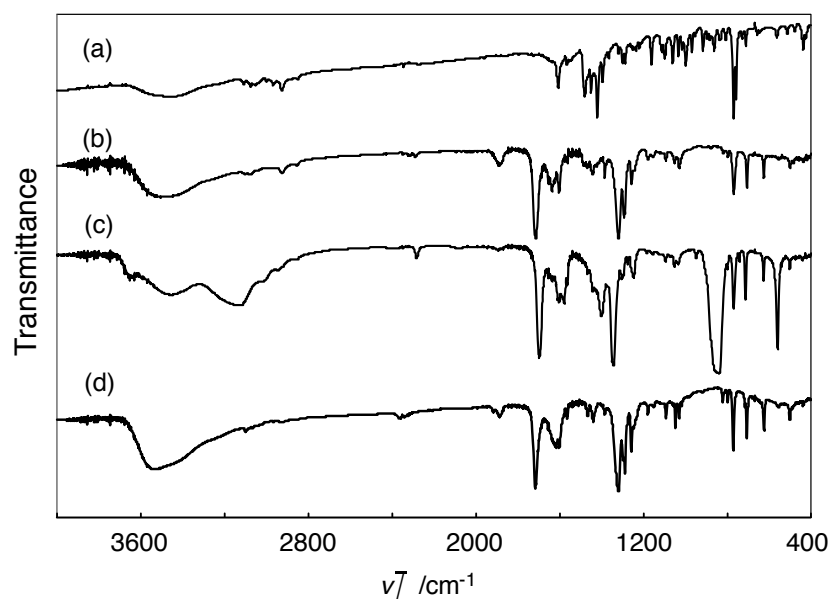

**Fig. S3** IR spectra of *fac*-[Ru<sup>III</sup>Cl<sub>3</sub>(ebpma)] (a), [Ru<sup>III</sup>Cl<sub>2</sub>(NCCH<sub>3</sub>)(bpca)]·H<sub>2</sub>O (b), [Ru<sup>II</sup>(NCCH<sub>3</sub>)<sub>3</sub>(bpca)]PF<sub>6</sub> (c), and [Ru<sup>III</sup>Cl<sub>3</sub>(Hbpca)] (d).

**(3) NMR spectra of  $[\text{Ru}^{\text{II}}(\text{NCCH}_3)_3(\text{bpca})]\text{PF}_6$ .**

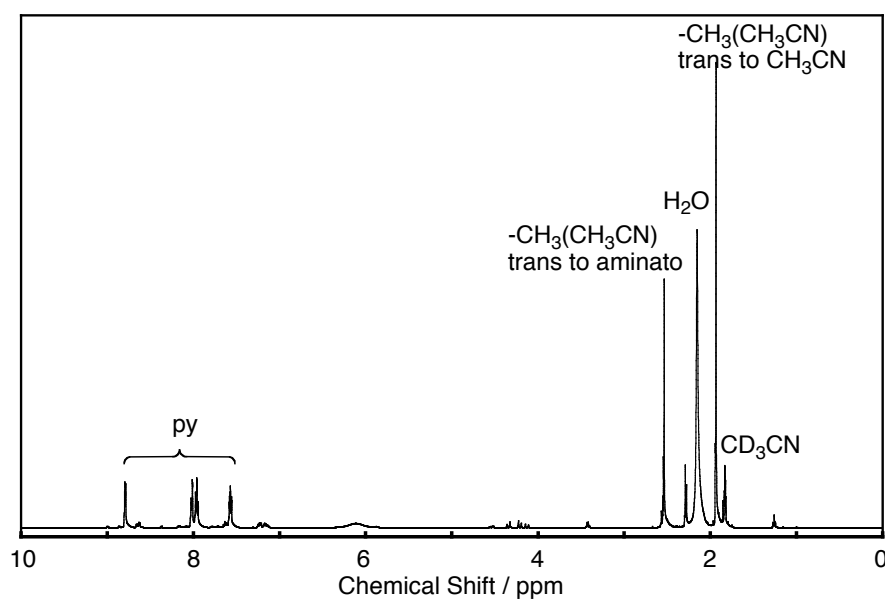

**Fig. S4**  $^1\text{H}$  NMR spectrum of  $[\text{Ru}^{\text{II}}(\text{NCCH}_3)_3(\text{bpca})]\text{PF}_6$  in  $\text{CD}_3\text{CN}$ .

**(4) X-ray crystallography for  $[\text{Ru}^{\text{III}}\text{Cl}_2(\text{NCCH}_3)(\text{bpca})]\cdot 0.5\text{NaClO}_4$ .**

Single crystals of  $[\text{Ru}^{\text{III}}\text{Cl}_2(\text{NCCH}_3)(\text{bpca})]\cdot 0.5\text{NaClO}_4$  were obtained by recrystallization from a  $\text{CH}_3\text{CN}-\text{H}_2\text{O}$  solution containing  $\text{NaClO}_4$  and then vapor diffusion of ether into the solution.

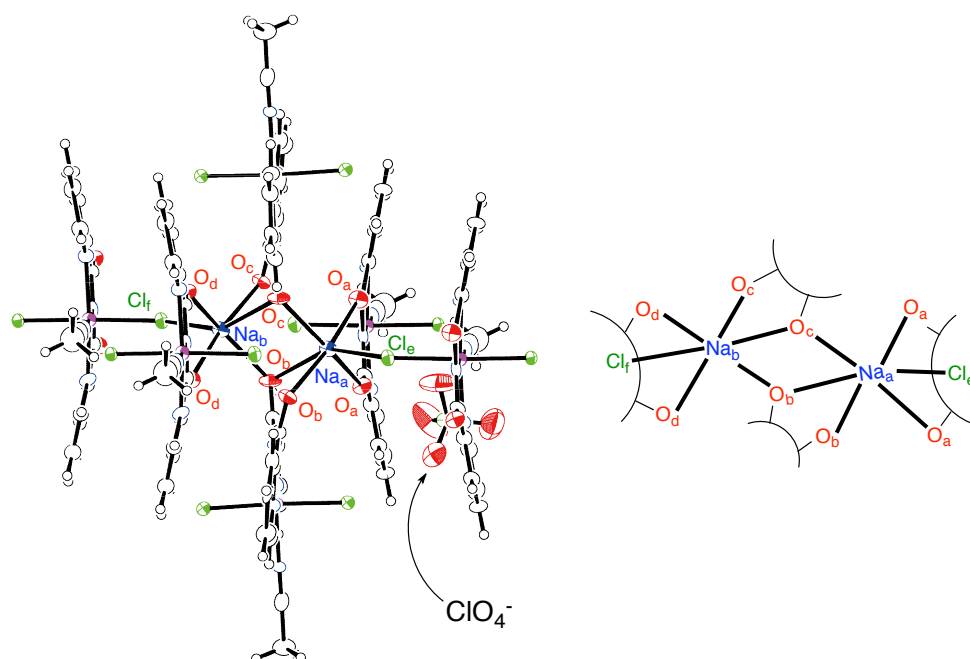

**Fig. S5** Structure of  $[\text{Ru}^{\text{III}}\text{Cl}_2(\text{NCCH}_3)(\text{bpca})]\cdot 0.5\text{NaClO}_4$  and structural network between  $\text{Na}^+$ ,  $\text{Cl}^-$  and  $\text{bpca}^-$  ligands.

**(5) UV-vis spectra of ruthenium complexes.**

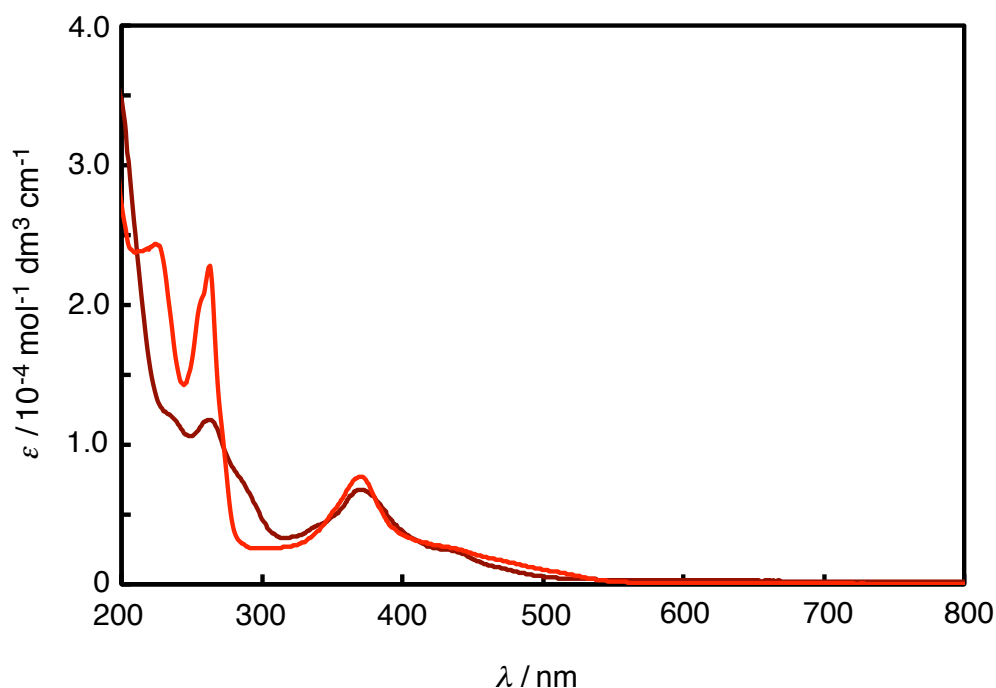

**Fig. S6** UV-vis spectra of  $[\text{Ru}^{\text{III}}\text{Cl}_2(\text{NCCH}_3)(\text{bpca})]$  (brown line) and  $[\text{Ru}^{\text{II}}(\text{NCCH}_3)_3(\text{bpca})]\text{PF}_6$  (red line) in  $\text{CH}_3\text{CN}$ .

**(6) Controlled potential electrolysis (CPE) experiment of  $[\text{Ru}^{\text{III}}\text{Cl}_3(\text{Hbpca})]$**

The CV of  $[\text{Ru}^{\text{III}}\text{Cl}_3(\text{Hbpca})]$  was shown in (a). CPE was performed at  $-0.6\text{ V}$  ( $Q/NF = 0.9$ ) in  $\text{CH}_3\text{CN}$  at  $-40^\circ\text{C}$  and the first reduction wave  $-0.31\text{ V}$  disappeared as shown (b). During the CPE experiment, the evolution of  $\text{H}_2$  was observed by GC. Further reduction at  $-1.2\text{ V}$  ( $Q/NF = 1.2$ ) afforded CV of (c). This CV revealed the formation of  $[\text{Ru}^{\text{II}}\text{Cl}_2(\text{NCCH}_3)(\text{bpca})]$  ( $-0.41$  and  $1.17\text{ V}$ ) and  $[\text{Ru}^{\text{II}}(\text{NCCH}_3)_3(\text{bpca})]^+$  ( $0.68\text{ V}$ ) under electrochemical conditions with a  $\text{Cl}^-$  dissociation, whose wave showed around  $0.7\text{ V}$  and overlapped with the wave of  $[\text{Ru}^{\text{II}}(\text{NCCH}_3)_3(\text{bpca})]^+$ . Finally, the wave of  $[\text{Ru}^{\text{II}}\text{Cl}_2(\text{NCCH}_3)(\text{bpca})]$  disappeared and the wave around  $0.7\text{ V}$  were bigger in a few days.

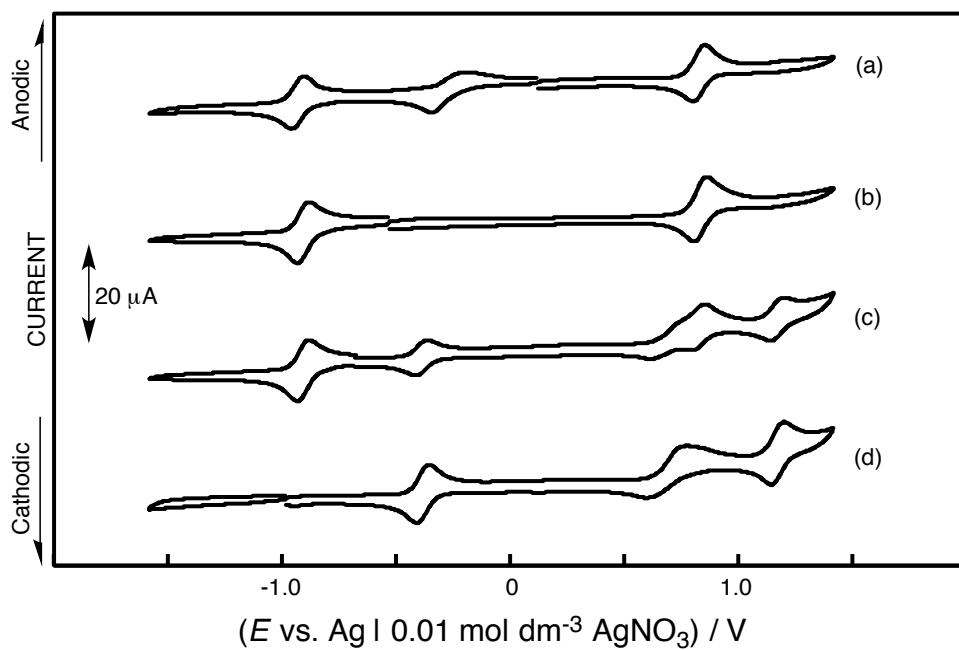

**Fig. S7** Cyclic voltammograms in  $\text{CH}_3\text{CN}$  at  $-40^\circ\text{C}$ ; (a) before electrolysis, (b) after CPE at  $-0.6\text{ V}$  ( $Q/NF = 0.9$ ), (c) further reduction CPE at  $-1.2\text{ V}$  ( $Q/NF = 1.2$ ) and (d) after standing for 1 day.
